# Supplementary material for: Joint morphogenetic cells in the adult mammalian synovium
Source: PubMed Central journal article supplement (PMC5493527; doi:10.1038/ncomms15040), 2017-05-16
Supplement: ncomms15040-s1.pdf [file ncomms15040-s1.pdf]

## SUPPLEMENTARY INFORMATION

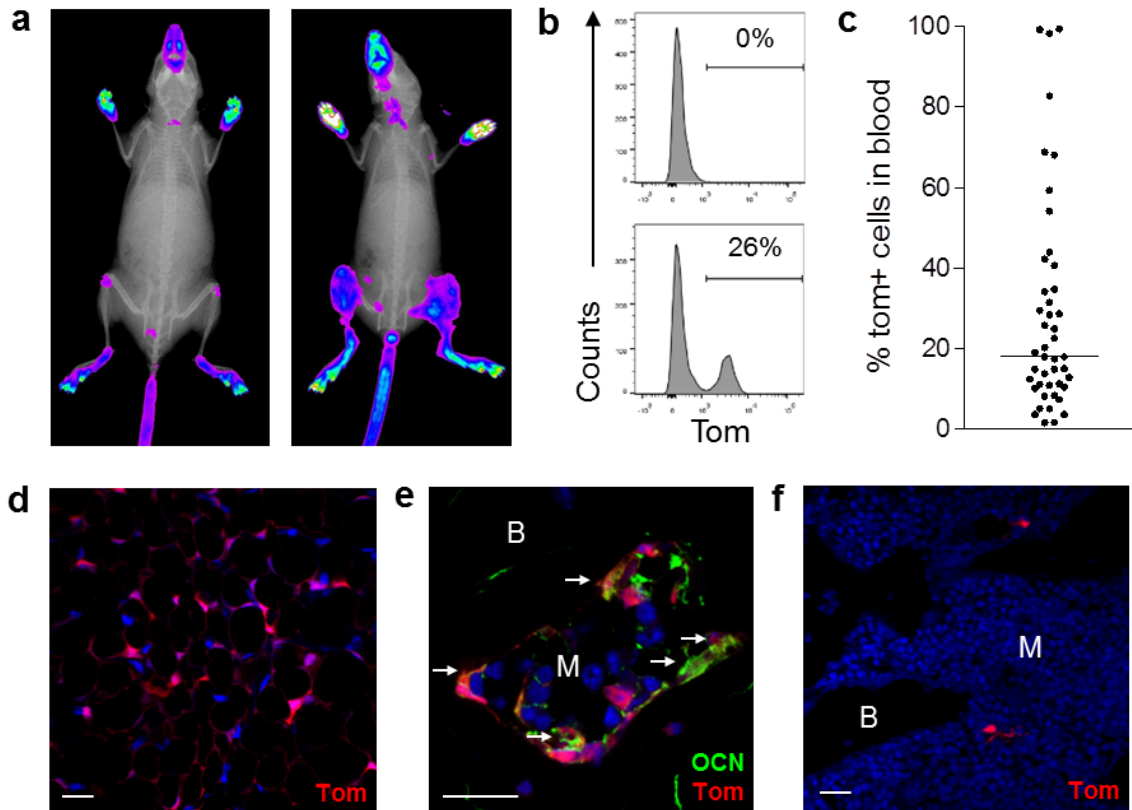

**Supplementary Figure 1. *Gdf5*-lineage tracing.** (a) *In vivo* imaging to detect Tom fluorescence in non-leaky (left) and leaky (right) adult *Gdf5-Cre;Tom* mice (n=3 leaky and 6 non-leaky mice). (b) Flow cytometry analysis of peripheral blood from non-leaky (top) and leaky (bottom) *Gdf5-Cre;Tom* mice. Analysis of 116 mice revealed 45 leaky mice (39%), in keeping with the previously reported 37% of leaky mice in the *Gdf5-Cre;LacZ* model<sup>1</sup>. (c) Percentage of Tom<sup>+</sup> cells in peripheral blood of 45 leaky mice. Line indicates median. (d) Tom<sup>+</sup> (red) cells in infrapatellar fat pad (n=4). Nuclei were counterstained with DAPI (blue). (e) Tom<sup>+</sup> (red) osteoblasts (arrows) in epiphyseal bone stained for osteocalcin (OCN; green) (n=2). Nuclei were counterstained with DAPI (blue). (f) Tom<sup>+</sup> (red) cells were rarely observed in metaphysis (n=3). Nuclei were counterstained with DAPI (blue). B, bone; M, marrow. Scale bars in all panels: 20  $\mu$ m.

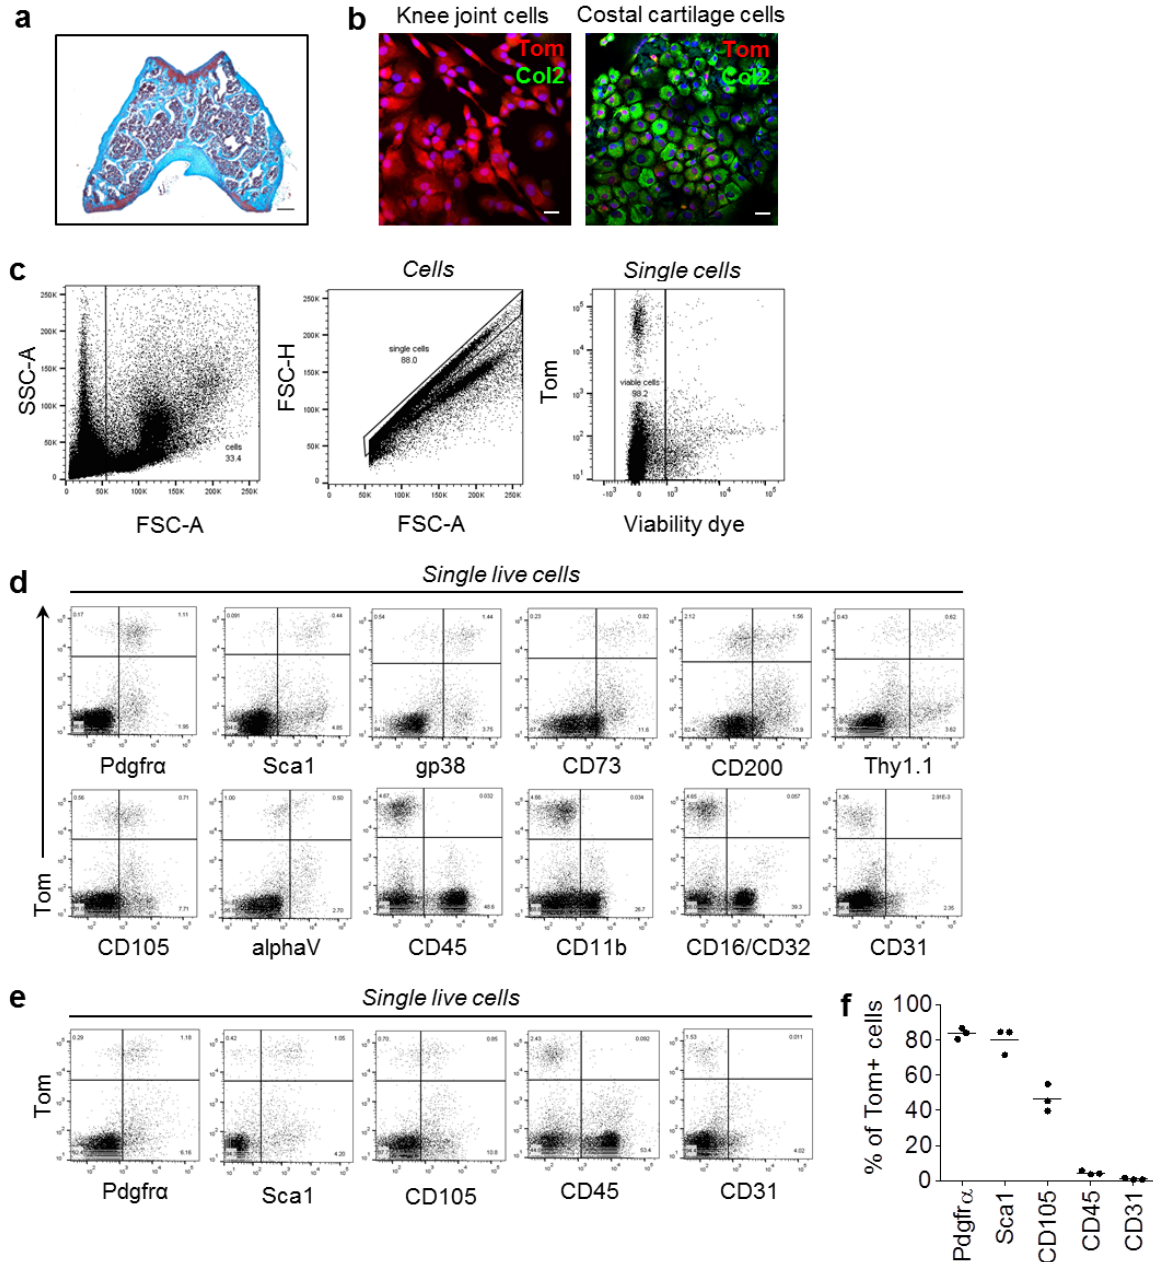

**Supplementary Figure 2. Phenotypic analysis of *Gdf5*-lineage cells using flow cytometry.** (a) Safranin O staining of a knee joint after 50 min collagenase digestion to isolate synovial cells. Cross-section through the femoral epiphysis shows articular cartilage and subchondral bone marrow remaining in the digested joint (n=9). (b) Immunostaining for Col2 (green) and Tom (red) of *Gdf5-Cre;Tom* cells at p0 isolated from knee joint using 50 min collagenase digestion (left), and costal cartilage using overnight collagenase digestion as positive control (right). Col2-expressing chondrocytes were detectable in the costal chondrocyte culture but not the synovial cell culture (n=2; 2 experiments). Nuclei were counterstained with DAPI (blue). Scale bars: 20  $\mu$ m. (c) Gating strategy to identify single live cells within fresh cell isolates. Erythrocytes and debris were gated out based on Forward-Side Scatter profile; doublets and aggregates were gated out based on Forward Scatter parameters; dead cells were excluded based on viability dye staining. (d,e,f) Cell surface marker analysis of freshly isolated cells from (d) 3-5-month-old (n=3-18; pooled data from 7 experiments), and (e,f) 10-12-month-old (n=3) *Gdf5-Cre;Tom* mice. (d,e) Representative flow cytometry plots showing Tom and marker positivity. (f) Percentage of Tom<sup>+</sup> cells from 10-12-month-old mice (n=3) expressing the cell surface markers tested.

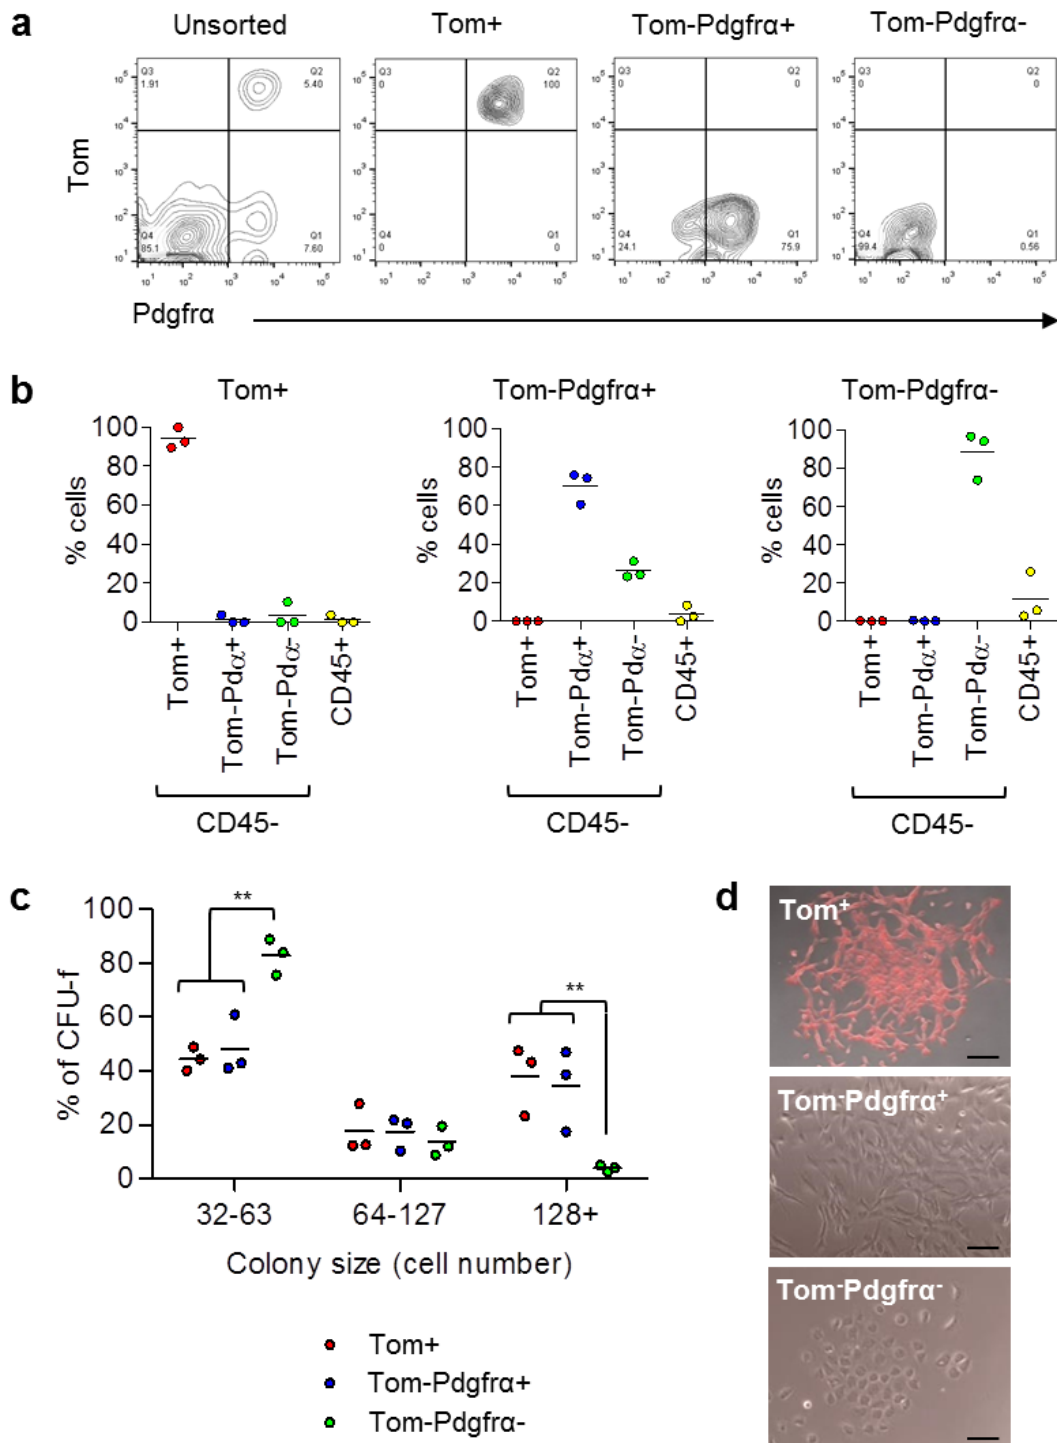

**Supplementary Figure 3. Colony-forming-unit activity of *Gdf5*-lineage cells.** (a) Representative flow plots of the different sorted cell fractions analysed immediately after sorting to assess purity (n=3). (b) Degree of enrichment achieved for the Tom<sup>+</sup>, Tom<sup>-</sup>Pdgfra<sup>+</sup>, and Tom<sup>-</sup>Pdgfra<sup>-</sup> fractions. (c) Colony size distribution, showing that Tom<sup>+</sup> and Tom<sup>-</sup>Pdgfra<sup>+</sup> stromal cells gave rise to significantly larger colonies on average compared to double-negative stromal cells. \*\*p<0.01; n=3; two-way ANOVA with Bonferroni post-test. (d) Representative images of colonies at time of analysis. Red: Tom fluorescence.

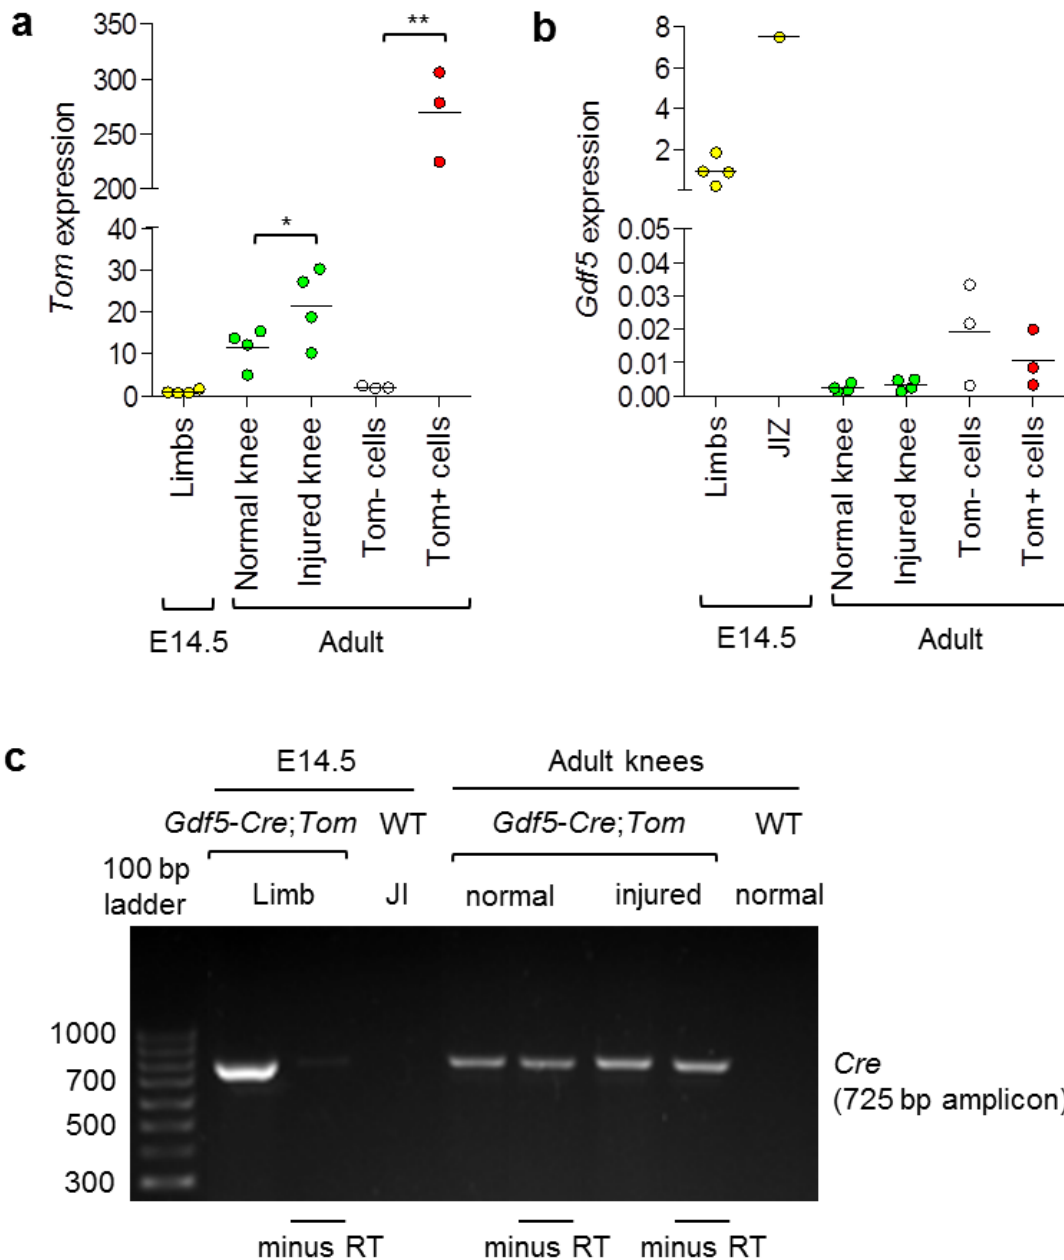

**Supplementary Figure 4. Validation of *Gdf5-Cre;Tom* model for lineage tracing from joint interzone.** Expression of (a) *Tom* and (b) *Gdf5* determined by quantitative RT-PCR, and (c) *Cre* detected by RT-PCR, in *Gdf5-Cre;Tom* E14.5 embryonic whole limbs (n=4), joint interzone (JI) of WT E14.5 embryo (n=1), soft tissues of normal and injured adult *Gdf5-Cre;Tom* mouse knees at 2-4 days after cartilage injury (n=4), and *Tom*<sup>+</sup> and *Tom*<sup>-</sup> sorted cells cultured for 44 d prior to RNA extraction (n=3). Data in (a,b) was normalised to *Gapdh* and expressed relative to E14.5 limbs. \*p=0.0303; \*\*p=0.0077 (Student's t-test). Data in (c) is shown as compilation image of lanes on same gel. Numbers on left indicate DNA ladder band sizes (in basepairs). Minus RT indicates reverse transcriptase was omitted from the sample, revealing that the amplified product detected in adult knees originated from genomic *Cre*. Taken together, data show that while *Tom* expression in adult knee soft tissues was >10 fold higher than E14.5 embryonic limbs, *Gdf5* expression was negligible and comparable to *Tom*<sup>-</sup> sorted cells which had remained negative for *Tom* during culture. In addition, no upregulation of *Gdf5* or *Cre* expression was detected after injury despite a ~2-fold increase in *Tom* expression.

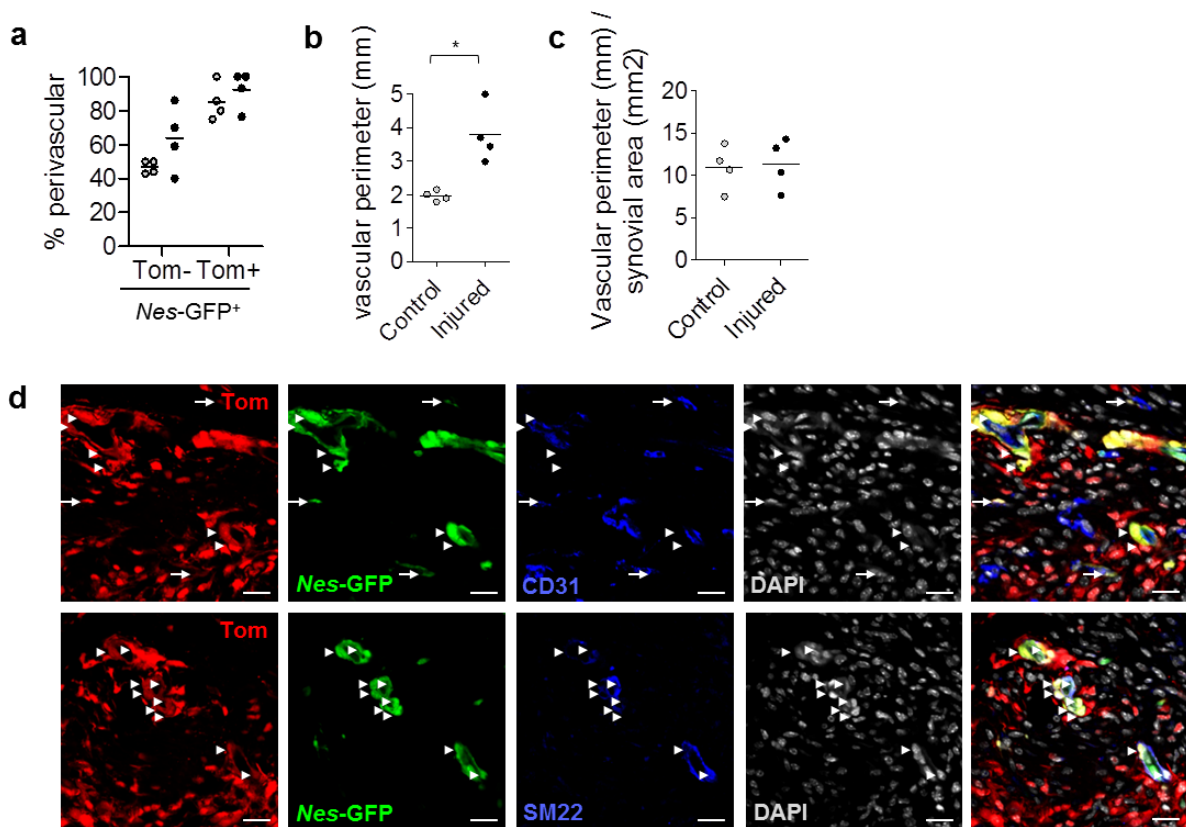

**Supplementary Figure 5. Relationship between *Gdf5*-lineage and *Nes*-GFP<sup>+</sup> cells in adult synovium.** (a) Percentage of labeled cells that were perivascular showing Tom<sup>+</sup>*Nes*-GFP<sup>+</sup> cells to be almost exclusively perivascular in both control and injured knee synovium (n=4). (b,c) The total vascular perimeter (in mm) in injured synovium was greater compared to control (b; \*p=0.0252; n=4; Student's t-test with Welch's correction) but not different when normalised for synovial area (c; n=4). (d) Separate channel images for Fig. 3i. Adjacent histological sections stained with CD31 (top; blue) or SM22 (bottom; blue) showing Tom<sup>+</sup> (red) and *Nes*-GFP<sup>+</sup> (green) double-labeled cells (appearing yellow) in injured knee synovium localising predominantly around arterioles and expressing the smooth muscle marker SM22 (arrowheads) with some Tom<sup>+</sup>*Nes*-GFP<sup>+</sup> cells found around other CD31<sup>+</sup> vessels (arrows) (n=3). Nuclei were counterstained with DAPI (blue). Scale bars: 20  $\mu$ m.

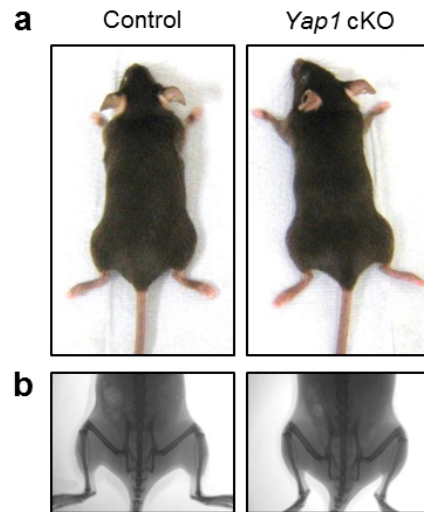

**Supplementary Figure 6. Conditional *Yap1* KO in *Gdf5* lineage.** Adult *Gdf5-Cre; Yap1<sup>fl/fl</sup>; Tom* (*Yap1* cKO) mice displayed no obvious phenotypic abnormalities compared to littermate controls. **(a)** Brightfield images. **(b)** X-ray images of hindlegs.

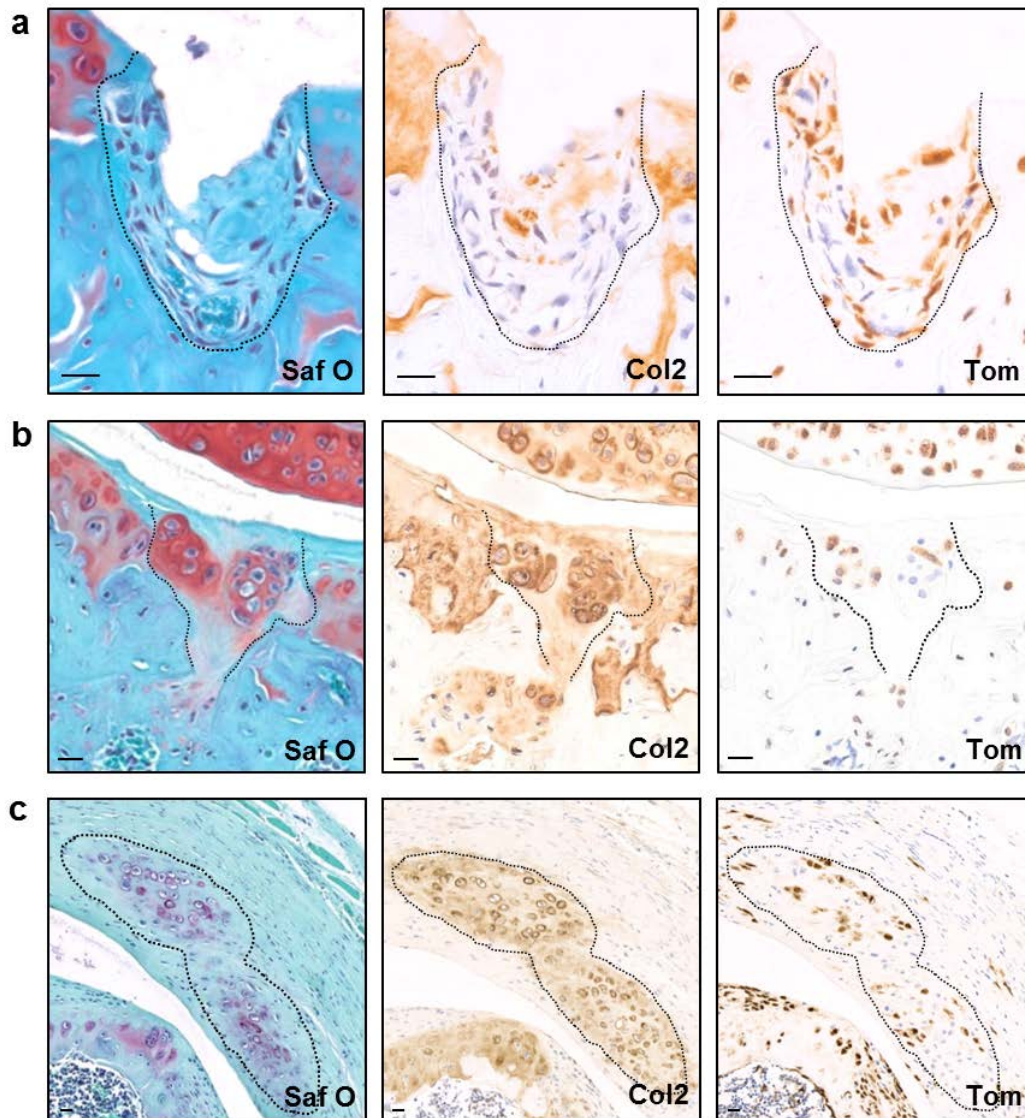

**Supplementary Figure 7. Contribution of *Gdf5*-lineage cells to cartilage formation after injury.** Tom<sup>+</sup> cells in (a) fibrous-like (n=8) and (b) cartilage-like repair of the articular cartilage (n=4), and (c) ectopic cartilage-like tissue in synovium (n=4). Consecutive histological sections (from left to right) were stained with Safranin O/fast green (Saf O), collagen type II (Col2; brown, with haematoxylin counterstain in blue), or Tom (brown, with haematoxylin counterstain in blue). Note the presence of reporter-negative chondrocytes in (b,c). Scale bars: 20  $\mu$ m.

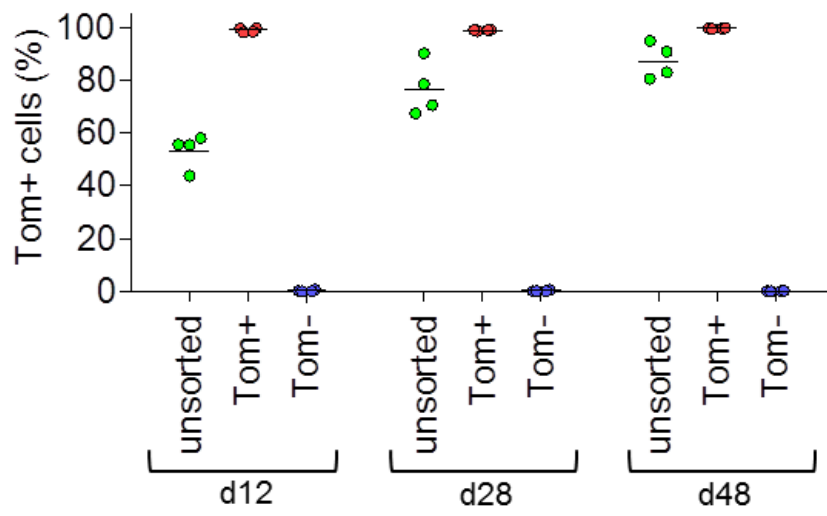

**Supplementary Figure 8. Culture expansion of *Gdf5*-lineage cells.** Tom<sup>+</sup> cells outgrew Tom<sup>-</sup> cells during routine culture expansion of unsorted knee joint cells from *Gdf5-Cre;Tom* mice (n=4; representative of 2 experiments).



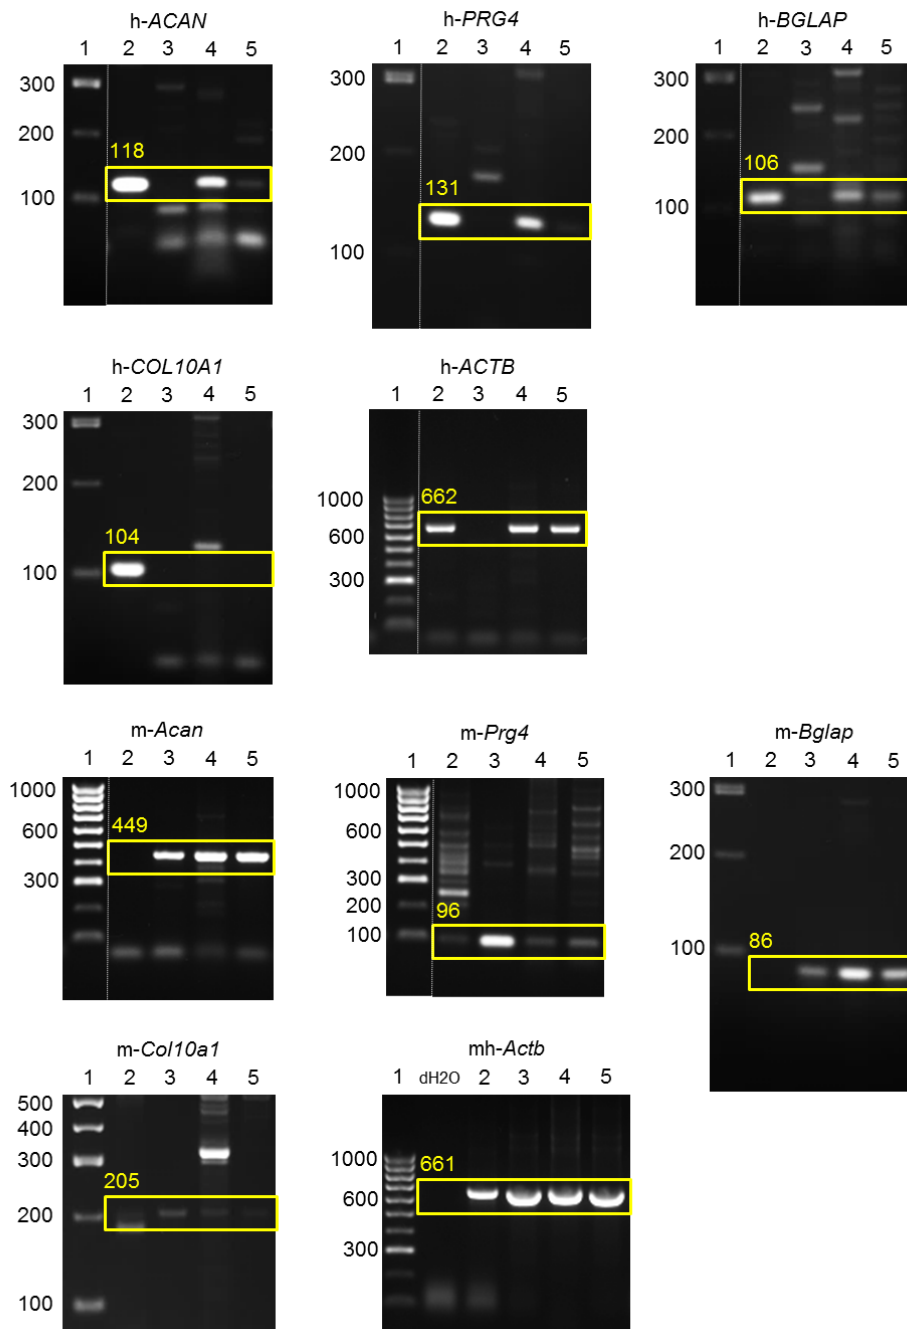

**Supplementary Figure 9. Gels of RT-PCR analysis shown in Fig. 8f.** Lanes show: 1) 100 bp DNA ladder; 2) human positive control; 3) mouse knee joint positive control; 4) human synovial MSC implant; 5) human dermal fibroblast implant. h: primer pair specific for human; m: primer pair specific for mouse; mh: primer pair detects both mouse and human. The human positive control (lane 2) served as negative control for detection of mouse genes; the mouse positive control (lane 3) served as negative control for detection of human genes; dH<sub>2</sub>O was used as negative control for detection of mh-*ACTB*. Dotted line indicates that lanes on the gel between the DNA ladder and the relevant samples were omitted from the image. Numbers on left indicate DNA ladder band sizes (in basepairs). Correct amplicon sizes are indicated in yellow on the gels (in basepairs).

**Supplementary Table 1. Antibodies for immunostaining.**

| <b>Antibody</b>        | <b>Clone</b> | <b>Manufacturer</b> | <b>Catalogue Number</b> | <b>Conjugation</b> |
|------------------------|--------------|---------------------|-------------------------|--------------------|
| RFP                    | polyclonal   | Rockland            | 600-401-379             | unconjugated       |
| mCherry                | polyclonal   | Sicgen antibodies   | AB0081-200              | unconjugated       |
| IdU                    | IIB5         | Abcam               | ab8955                  | unconjugated       |
| CldU                   | BU1/75       | Abcam               | ab6326                  | unconjugated       |
| Collagen type 2        | polyclonal   | Abcam               | ab21291                 | unconjugated       |
| Osteocalcin            | polyclonal   | AbD Serotec         | 70601815                | unconjugated       |
| Cadherin-11            | polyclonal   | Invitrogen Corp.    | 71-7600                 | unconjugated       |
| CD140a/Pdgfra          | Polyclonal   | Abcam               | ab61219                 | unconjugated       |
| Lubricin               | polyclonal   | Abcam               | ab28484                 | unconjugated       |
| CD31                   | polyclonal   | Abcam               | ab28364                 | unconjugated       |
| Gremlin                | polyclonal   | R&D Systems         | AF956                   | unconjugated       |
| CD16/CD32              | polyclonal   | R&D Systems         | AF1460                  | unconjugated       |
| Yap                    | polyclonal   | Novus Biologicals   | NB110-58358             | unconjugated       |
| Ki67                   | MIB-1        | Dako                | M7240                   | unconjugated       |
| Transgelin/SM22        | polyclonal   | R&D systems         | AF7886                  | unconjugated       |
| CD68                   | KP1          | eBioscience         | 14-0688                 | unconjugated       |
| CD55/DAF               | polyclonal   | R&D Systems         | AF2009                  | unconjugated       |
| Goat anti-rabbit IgG   | polyclonal   | Vector Labs         | BA-1000                 | biotinylated       |
| Donkey anti-rabbit IgG | polyclonal   | ThermoFisher        | A-21206                 | Alexa Fluor@488    |
| Donkey anti-rabbit IgG | polyclonal   | ThermoFisher        | A-21207                 | Alexa Fluor@594    |
| Goat anti-rabbit IgG   | polyclonal   | ThermoFisher        | A-11012                 | Alexa Fluor@594    |
| Donkey anti-rabbit IgG | polyclonal   | Abcam               | ab150067                | Alexa Fluor@647    |
| Donkey anti-goat IgG   | polyclonal   | ThermoFisher        | A-11055                 | Alexa Fluor@488    |
| Donkey anti-goat IgG   | polyclonal   | Abcam               | ab150136                | Alexa Fluor@594    |
| Donkey anti-mouse IgG  | polyclonal   | Abcam               | ab150109                | Alexa Fluor@488    |
| Goat anti-mouse IgG    | polyclonal   | ThermoFisher        | A-11029                 | Alexa Fluor@488    |
| Goat anti-rat IgG      | polyclonal   | ThermoFisher        | A-21094                 | Alexa Fluor@633    |
| Donkey anti-sheep IgG  | polyclonal   | ThermoFisher        | A-21448                 | Alexa Fluor@647    |

**Supplementary Table 2. Antibodies for flow cytometry.**

| <b>Antibody</b> | <b>Clone</b> | <b>Manufacturer</b> | <b>Catalogue Number</b> | <b>Conjugated</b> |
|-----------------|--------------|---------------------|-------------------------|-------------------|
| CD45            | 30-F11       | BD Biosciences      | 563890                  | BV421             |
| CD31            | 390          | eBioscience         | 48-0311                 | eFluor450         |
| CD16/CD32       | 2.4G2        | BD Biosciences      | 558636                  | APC               |
| CD11b           | M1/70        | BD Biosciences      | 553312                  | APC               |
| CD140a/Pdgfra   | APA5         | BD Biosciences      | 562774                  | BV421             |
| Sca1            | D7           | BD Biosciences      | 560654                  | APC-Cy7           |
| CD105           | MJ7/18       | BD Biosciences      | 562761                  | AF647             |
| gp38            | 8.1.1        | Biolegend           | 127410                  | APC               |
| AlphaV/CD51     | RMV-7        | eBioscience         | MCA2461A647T            | AF647             |
| Thy1.1          | OX-7         | BD Biosciences      | 563770                  | BV421             |
| CD200           | OX90         | eBioscience         | 50-5200                 | eFluor660         |
| CD73            | TY/23        | BD Biosciences      | 561543                  | AF647             |
| LepR            | polyclonal   | Bioss               | bs-0109R-A647           | AF647             |

**Supplementary Table 3. Primers for RT-PCR.**

| Gene           | Species       | Primer | Sequence (5' to 3')            | Amplicon (bp) |
|----------------|---------------|--------|--------------------------------|---------------|
| <i>Tom</i>     | n/a           | Fw     | CTGTTCTGTACGGCATGG             | 196           |
|                |               | Rev    | GGCATTAAAGCAGCGTATCC           |               |
| <i>Gdf5</i>    | Mouse         | Fw     | CGGACTGTAACCCCAAAAGGA          | 373           |
|                |               | Rev    | TCCGTAAGATCCGCAGTTTCAG         |               |
| <i>Gapdh</i>   | Mouse         | Fw     | GTGAAGGTCCGTGTGAACG            | 250           |
|                |               | Rev    | ATTTGATGTTAGTGGGGTCTCG         |               |
| <i>Cre</i>     | n/a           | Fw     | GCCTGCATTACCGGTCGATGCAACGA     | 725           |
|                |               | Rev    | GTGGCAGATGGCGCGGCAACACCATT     |               |
| <i>ACAN</i>    | Human         | Fw     | CGGTCTACCTCTACCCTAACCA         | 118           |
|                |               | Rev    | GGTGTGCCACCCTCTTCTT            |               |
| <i>Acan</i>    | Mouse         | Fw     | CGTTGCAGACCAGGAGCAAT           | 449           |
|                |               | Rev    | TCTTCTGCCCGAGGGTCTA            |               |
| <i>PRG4</i>    | Human         | Fw     | CTGGCCTGAATCTGTGTATTTTT        | 131           |
|                |               | Rev    | GTGTCGTTTCTCCATACACTGG         |               |
| <i>Prg4</i>    | Mouse         | Fw     | GCCACCTGCAACTGTGATTA           | 96            |
|                |               | Rev    | GCGTCCTTTGCAGGAGAG             |               |
| <i>BGLAP</i>   | Human         | Fw     | GGCGCTACCTGTATCAATGG           | 106           |
|                |               | Rev    | TCAGCCAACCTCGTCACAGTC          |               |
| <i>Bglap</i>   | Mouse         | Fw     | AGACTCCGGCGCTACCTT             | 86            |
|                |               | Rev    | CAAGCAGGGTTAAGCTCACA           |               |
| <i>COL10A1</i> | Human         | Fw     | CACCTTCTGCACTGCTCATC           | 104           |
|                |               | Rev    | GGCAGCATATTCTCAGATGGA          |               |
| <i>Col10a1</i> | Mouse         | Fw     | GCATCTCCCAGCACCAGAAT           | 205           |
|                |               | Rev    | TCTCCTCTTACTGGAATCCCTTT        |               |
| <i>ACTB</i>    | Human         | Fw     | CCGACAGGATGCAGAAGGAG           | 662           |
|                |               | Rev    | GGCACGAAGGCTCATCATTC           |               |
| <i>Actb</i>    | Mouse + Human | Fw     | TGACGGGGTCACCCACACTGTGCCCATCTA | 661           |
|                |               | Rev    | CTAGAAGCATTGCGGTGGACGATGGAGGG  |               |

**Supplementary Reference**

1. Rountree, R.B. *et al.* BMP receptor signaling is required for postnatal maintenance of articular cartilage. *PLoS. Biol.* **2**, e355 (2004).
